# Supplementary material
Source: PubMed Central journal article supplement (PMC5417829)
Supplement: 10.1074_M116.064576_mcp.M116.064576-1.pdf [file 10.1074_M116.064576_mcp.M116.064576-1.pdf]

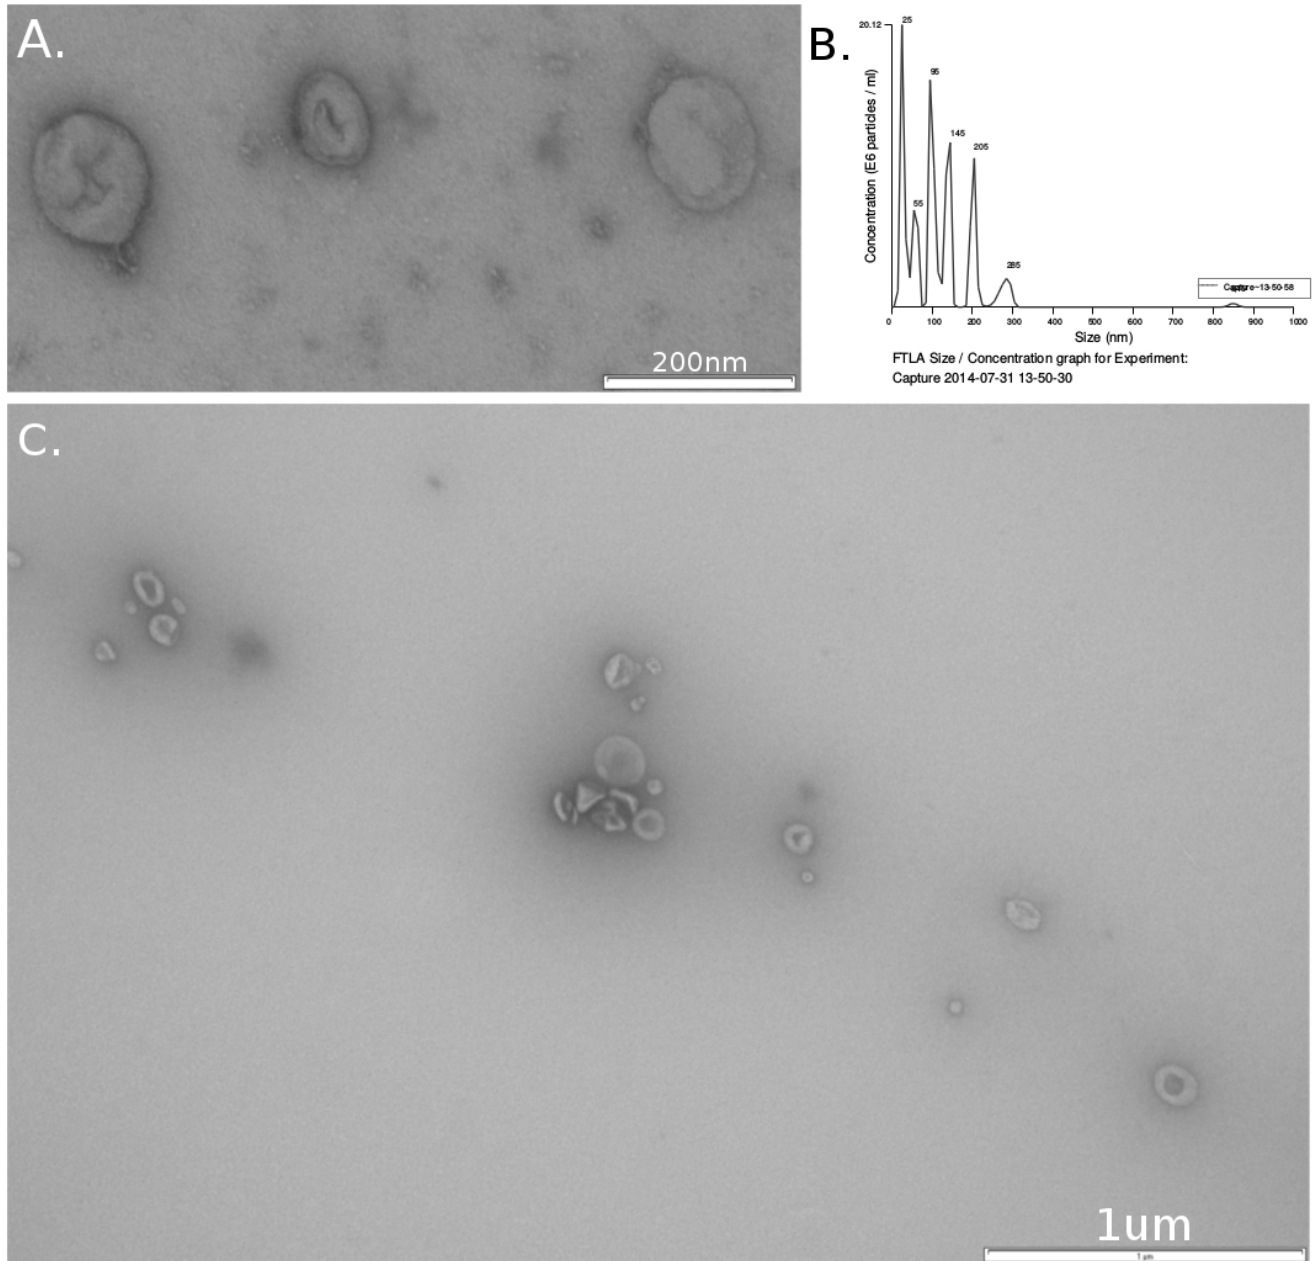

**Supplemental Figure 1: A. and C.** Transmission electron micrographs of exosome preparations representative of those used in proteomics experiments; **B.** NanoSight results from a representative exosome preparation showing enrichment of particles between 40-100nm.
